1  
2  
3  
4  
5  
6  
7  
8  
9  
10  
11  
12  
13  
14  
15  
16  
17  
18  
19  
20  
21  
22  
23  
24

**Shiitake mycelium fermentation improves digestibility, nutritional value, flavor and functionality of plant proteins.**

Anthony Clark<sup>1</sup>, Bhupendra K Soni<sup>1</sup>, Brendan Sharkey<sup>1</sup>, Terry Acree<sup>3</sup>, Edward Lavin<sup>3</sup>, Hannah M. Bailey<sup>2</sup>, Hans H. Stein<sup>2</sup>, Ashley Han<sup>1</sup>, Marc Elie<sup>1</sup>, Marina Nadal<sup>1\*</sup>

<sup>1</sup> MycoTechnology, 18250 E. 40<sup>th</sup> Avenue, Suite 50, Aurora, CO 80011

<sup>2</sup> Division of Nutritional Sciences, University of Illinois, Urbana, IL 61801

<sup>3</sup> Department of Food Sciences, Cornell University, Ithaca, NY 14853-5701

\* For correspondence Email: [mnadal@mycoiq.com](mailto:mnadal@mycoiq.com)

**Key words:** Plant-protein; Digestibility; Fermentation; Mycelium; Shiitake

**ABSTRACT**

Plant proteins can serve as inexpensive and environmentally friendly meat-replacements. However, poor taste characteristics and relatively low nutritional value prevent their full acceptance as meat substitutes. Fermentation of food has been historically used to improve the quality of foods. In this work we describe the improvement in digestibility, nutritional value, physical properties, and organoleptic characteristics, of a pea and rice protein concentrate blend through fermentation with shiitake mushroom mycelium. Ileal digestibility pig studies show increases in the DIAAS for the shiitake fermented pea and rice protein blend turning the blend into an “excellent source” of protein for humans. The fermentation also increases the solubility of the protein blend and reduces the content of the antinutrient compounds phytates and protease

25 inhibitor. Mass spectrometry and sensory analyses of fermented protein blend indicates that  
26 fermentation leads to a reduction in off-note compounds substantially improving its organoleptic  
27 performance.

28

29

30

31

32

## 33 INTRODUCTION

34 Plant-based protein foods are emerging as alternative to animal derived protein (Sexton et  
35 al., 2019). Several advantages make plant protein an ideal replacement to meat; however, two  
36 main drawbacks prevent their full acceptance in the food space. In general, the nutritional value  
37 of unprocessed single source plant protein for humans is often inferior to that of animal protein  
38 sources. By themselves, proteins derived from pea (*Pisum sativum*) and rice (*Oryza sativa*) are  
39 deficient in lysine, methionine and some branched-chain amino acids (Gorissen et al., 2018), and  
40 are therefore considered of lower nutritional quality (USDA, 2013). However, if combined in  
41 correct proportions, pea protein and rice protein may complement each other to deliver a blend  
42 with an ideal balance of indispensable amino acids that is adequate for human nutrition. In 1991  
43 the Food and Agriculture organization (FAO) and World Health Organization (WHO) introduced  
44 the Protein Digestibility Corrected Amino Acid Score (PDCAAS)(FAO/WHO, 1991). This  
45 concept is based on the assumption that a protein blend's nutritional value is determined not only  
46 by the amino acid profile, but also by the ability of the human gastrointestinal tract to hydrolyze  
47 individual proteins and by the rate at which free amino acids are absorbed into the blood stream  
48 (FAO, 2013). Although the PDCAAS score has been widely adopted to describe protein  
49 nutritional value, it is calculated from the total tract digestibility of crude protein (CP) and based  
50 on the assumption that all amino acids (AAs) in CP have the same digestibility. However, the  
51 digestibility of CP is not representative of the digestibility of all AAs because individual AAs are  
52 digested with different efficiencies (Stein et al., 2007). Moreover, fermentation of the free AAs  
53 by the lower intestine microbiome can affect fecal AA excretion and hence alter the PDCAAS  
54 values (Sauer & Ozimek, 1986). Therefore, measuring digestibility at the distal ileum (the end

55 of the small intestine) provides the most realistic estimate of AA bioavailability as compared to  
56 total tract digestibility (Cervantes-Pahm et al., 2014). Based on these facts, in 2013 the FAO  
57 introduced the Digestible Indispensable Amino Acid Score (DIAAS) as a method to evaluate  
58 protein quality (Wolfe et al., 2016). Because DIAAS is calculated by measuring ileal digestibility  
59 of individual AAs, it more accurately describes the true nutritional value of dietary protein than  
60 the PDCAAS method (Bailey & Stein, 2019). Additionally, DIAAS method provides a more  
61 precise assessment of protein quality for a blend of different dietary protein sources. Nonetheless,  
62 PDCAAS is still widely used in North America as measurement of protein quality.

63 Protein digestibility is also partially dependent on the solubility of the protein material  
64 and the presence of residual antinutrients such as protease inhibitors and phytic acid (Afify et al.,  
65 2012). Cereal grains and legumes contain several protease inhibitors of major concern (Samtiya  
66 et al., 2020). Particularly pea is rich in trypsin inhibitors (Avilés-Gaxiola et al., 2018) while rice  
67 bran is known to contain considerable amounts of the oryzacystatin-I (OC-I), a rice cystatin  
68 (cysteine protease inhibitor) which binds tightly and reversibly to the papain-like group of  
69 cysteine proteinases (Abe et al., 1987). Although mounting scientific evidence is starting to  
70 reveal extended health benefits of plant antinutrients (Lajolo & Genovese, 2002), the  
71 removal/reduction of such compounds in plant protein concentrates remains highly desirable to  
72 increase digestibility of proteins. More often, antinutrients complex with proteins forming  
73 precipitates that are not easily accessible by gastric digestive enzymes (Joye, 2019). Phytic acid  
74 is the main storage of phosphorous in seeds of legumes and cereals (Reddy et al., 1982). Due to  
75 its 6 phosphate groups, phytic acid acts as a powerful chelating agent, interfering with absorption  
76 of key minerals such as zinc, iron, magnesium and calcium in the gastrointestinal tract during  
77 digestion (Bohn et al., 2008). Moreover, because phytate can sequester  $\text{Ca}^{2+}$  and  $\text{Mg}^{2+}$ , co-factors

78 of digestive proteases and  $\alpha$ -amylases, it can indirectly impair digestion (Deshpande & Cheryan,  
79 1984; Khan & Ghosh, 2013). A direct inhibitory effect of phytate on these enzymes has also  
80 been proposed (Sharma et al., 1978). Therefore, the presence of phytate in protein concentrates  
81 has the potential of negatively impacting digestibility in several ways and consequently lowering  
82 the nutritional quality of plant proteins. Removal of phytates greatly improves the nutritional  
83 value of foods and several methodologies are employed in the food industry to eliminate their  
84 presence (Gupta et al., 2015). Phytases, the enzymes responsible for hydrolyzing phytic acid into  
85 inositol and phosphate (Lei et al., 2013) are widely distributed among microorganisms, including  
86 fungi such as shiitake (Jatuwong et al., 2020).

87 The other main disadvantage of plant derived proteins are their undesirable organoleptic  
88 characteristics. Specifically, plant proteins often display off-flavors, which makes their  
89 incorporation into meat or dairy analog products challenging. For example, plant proteins such as  
90 pea proteins are associated with beany aromas due to the presence of the volatiles 3-alkyl-2-  
91 methoxypyrazines (galbazine) and have bitter flavors associated with plant lipids and saponins  
92 (Gläser et al., 2020; Roland et al., 2017).

93 In this work we describe the improvement in digestibility, nutritional value, and  
94 organoleptic characteristics of FermentIQ<sup>®</sup> protein (Soni Bhupendra, Kelly Brooks, Langan Jim,  
95 Hahn Alan, 2018), a shiitake-fermented pea-rice protein concentrate blend, as compared to the  
96 same unfermented pea and rice protein blend.

97

## 98 **MATERIALS AND METHODS**

99

100 *Ileal Digestibility Studies*

101 Two diets were formulated with the unfermented and fermented protein blends included  
102 in one diet each as the only AA containing ingredient. The third diet was a nitrogen-free diet that  
103 was used to measure basal endogenous losses of CP and AA. Vitamins and minerals were  
104 included in all diets to meet or exceed current requirement estimates for growing pigs. All diets  
105 also contained 0.4% titanium dioxide as an indigestible marker, and all diets were provided in  
106 meal form.

107 Nine castrated male pigs at 10 weeks of age (initial BW:  $28.5 \pm 2.3$  kg) were equipped  
108 with a T-cannula in the distal ileum and allotted to a triplicated  $3 \times 3$  Latin square design with 3  
109 pigs and 3 periods in each square. The number of pigs exceeded the recommended minimum  
110 number of pigs needed to obtain reliable values for DIAAS(FAO, 2014). Diets were randomly  
111 assigned to pigs in such a way that within each square, one pig received each diet, and no pig  
112 received the same diet twice during the experiment. Therefore, there were 9 replicate pigs per  
113 treatment. Pigs were housed in individual pens (1.2 x 1.5 m) in an environmentally controlled  
114 room. Pens had smooth sides and fully slatted tribar floors. A feeder and a nipple drinker were  
115 also installed in each pen.

116 All pigs were fed their assigned diet in a daily amount of 3.3 times the estimated energy  
117 requirement for maintenance (i.e., 197 kcal ME per  $\text{kg}^{0.60}$ ). Feeding and collection of fecal  
118 samples and ileal digesta samples followed procedures described previously (Mathai et al.,  
119 2017).

120 At the conclusion of the experiment, ileal samples were thawed, mixed within animal diet,  
121 and a sub-sample was collected for chemical analysis. Ileal digesta samples were lyophilized and  
122 finely ground prior to chemical analysis. Fecal samples were dried in a forced-air oven and  
123 ground through a 1 mm screen in a Wiley Mill (model 4, Thomas Scientific) prior to chemical

124 analysis. All samples were analyzed for dry matter (DM; Method 927.05) and for CP by  
125 combustion (Method 990.03) at the Monogastric Nutrition Laboratory at the University of  
126 Illinois Champagne, IL. All diets, fecal samples, and ileal digesta were analyzed in duplicate for  
127 titanium (Method 990.08; Myers et al., 2004). The two proteins, all diets, and ileal digesta  
128 samples were also be analyzed for AA [Method 982.30 E (a, b, c)](Horowitz et al., 1957).

129 Values for apparent ileal digestibility (AID) and standardized ileal digestibility (SID) of  
130 CP and AA were calculated (Stein et al., 2007), and standardized total tract digestibility (STTD)  
131 of CP were calculated as well (Mathai et al., 2017). Values for STTD and SID were used to  
132 calculate values for PDCAAS and PDCAAS-like, and DIAAS, respectively, as previously  
133 explained (Leser, 2013; Mathai et al., 2017).

134 The protocol for the animal work was reviewed and approved by the Institutional Animal Care  
135 and Use Committee at the University of Illinois (Protocol Number 16113).

136 *Solubility*: Solubility of protein samples was calculated as:

$$\% \text{ Solubility} = \frac{m_{\text{dry powder filtrate}}}{m_{\text{dry powder total}}} = \frac{m_{\text{dry powder filtrate}}}{m_{\text{initial powder total}} - \% \text{Moisture} * m_{\text{initial powder total}}}$$

137 Sample moisture was calculated after placing 5g of protein powder in a desiccator and recording

138 the dried weight, as follows:  $\% \text{Moisture} = \frac{m_{\text{initial powder}} - m_{\text{dry powder}}}{m_{\text{initial powder}}} * 100\%$

139 Dry powder filtrate was calculated by dissolving 2.5 g of dried sample in 50 ml at room  
140 temperature and adjusting the pH to either 3, 5, 6, 7, or 8, with 1M HCl or 1M NaOH. Samples  
141 were mixed thoroughly and centrifugated at 9000 RPM for 10 minutes. Supernatant was vacuum  
142 filtrated using GE Whatman 47mm Grade 4 filter papers (GE) and the weight recorded.

143 *Phytate Measurement*: Phytic acid was measured by Eurofins Scientific, Luxembourg, by the  
144 method of stable phytate-iron complex formation in dilute acid solution.

145 *Enzyme inhibition assays:* Trypsin inhibition assay was performed by Eurofins Scientific  
146 (Method AOC S Ba 12-75). Chymotrypsin was performed by Reaction Biology Corporation,  
147 Malvern, PA (<https://www.reactionbiology.com>). Papain and subtilisin inhibition assays were  
148 performed as previously described<sup>43</sup>. Briefly, inhibitory activity was assessed by incubating 0.5  
149 mL extract of fermented product with 0.5 mL of commercial papain (EC 3.4.22.2) or subtilisin  
150 (EC 3.4.21.62) and incubating at 37°C for 15 min. Then, 5 mL of a casein solution (0.65% w/v)  
151 was added to the assay solution and the mixture was further incubated at 55°C for exactly 10 min.  
152 Inhibitory activity was measured by obtaining the difference between the enzyme activity in the  
153 absence and in the presence of the fermented protein blend.

154

155 *GC-O and CHARM (Combined Hedonic Aroma Response Measurement) analysis:* identification  
156 of volatile compounds in fermented and unfermented protein blend samples was done by gas  
157 chromatography/olfactometry (GC/O) using human “sniffers” to assay for odor activity among  
158 volatile analytes as previously described (Acree & van Ruth, 2003).

159 *Sensory Panel Assessment:* The powdered unfermented and fermented protein blend samples  
160 were used at 10% in room temperature water and mixed. Sensory testing was performed by  
161 Sensation Research, Mason, OH (<https://sensationresearch.com/>) using a combination of  
162 Spectrum Method<sup>TM</sup> and Quantitative Descriptive Analysis (QDA) (Hootman et al., 1992).  
163 Trained descriptive panelists used full descriptive analysis technique to develop the language,  
164 ballot, and rate profiles of the products on aroma. Eleven panelists were trained for 2 sessions  
165 with 2 individual evaluations per sample for data collection. Eleven trained panelists  
166 (experienced from prior protein consensus panels) evaluated appearance for all samples  
167 immediately after mixing to capture initial scores and minimize variability. Data were analyzed  
168 using Senpaq: Descriptive Analysis - Analysis of variance (ANOVA).



169

170

## RESULTS

### 171 **Digestibility of fermented pea and rice protein blend**

172           The use of pigs as models for humans was recommended due to the impracticality of  
173 obtaining ileal digesta from humans and because pigs are better models for humans than rats  
174 (FAO, 2013). Subsequently, DIAAS in both animal and plant proteins have been determined  
175 using the pig model the same way as was done in this experiment (Cervantes-Pahm et al., 2014;  
176 Mathai et al., 2017)

177           Nutritional analysis of the unfermented and fermented protein blends indicated that the  
178 CP content was similar in both samples with 77.57% and 76.77%, respectively (Table 1).  
179 Concentrations of total indispensable AA were also similar in the two protein blends, with the  
180 unfermented blend containing 37.51% and the fermented blend containing 35.88%. However, the  
181 concentration of Lysine (Lys) was approximately 25% greater in the unfermented sample  
182 compared with the fermented sample.

183           The Apparent Ileal Digestibility (AID) and Standardized Ileal Digestibility (SID) of CP  
184 did not differ between the unfermented and the fermented pea-rice protein concentrate (Table 2).  
185 In addition, the AID and SID of all indispensable and dispensable AA did not differ between the  
186 two proteins.

187           The PDCAAS values were calculated using the FAO recommended scoring  
188 patterns(Leser, 2013) for “young children” (6 months to 3 years) and for “older children,  
189 adolescents, and adults” (3+ years) (Table 3), and found not to be different between unfermented  
190 and fermented protein blends for both age groups. For young children, PDCAAS values were  
191 similar to those calculated for children 2 to 5 years, with the unfermented and fermented proteins

192 having PDCAAS values of 86 and 91, respectively. For PDCAAS values calculated for older  
193 children, unfermented and fermented proteins had values of 101 and 108, respectively. The first  
194 limiting AA when compared with the AA requirements was SAA and Lys for unfermented  
195 protein and fermented protein, respectively, for both age groups.

196 DIAAS was calculated for “young children” and for “older children, adolescents, and  
197 adults” (Sotak-Peper et al., 2017) (Table 4). The DIAAS values calculated for both age groups  
198 were greater ( $P < 0.05$ ) for the fermented than for the unfermented pea-rice protein. For young  
199 children, the DIAAS was 70 and 86 for unfermented and fermented proteins, respectively, which  
200 represents a 23% increase. For older children, adolescents, and adults, the DIAAS was 82 and  
201 102 for unfermented and fermented proteins, respectively, which represents a 24% increase. The  
202 first limiting AA in the proteins when compared with the AA requirements for both age groups  
203 was SAA and Lys for unfermented and fermented proteins, respectively.

204

### 205 **Solubility and antinutrient levels of fermented pea and rice protein blend**

206 To determine if the fermentation process also impacts physical properties of the pea and  
207 rice protein blend, the solubility of the fermented and unfermented protein concentrate blends  
208 was calculated across a wide range of pH. The dissolved solids of three independently fermented  
209 protein blend samples were consistently higher than that of unfermented protein blend (raw pea +  
210 rice) showing an increase at all pH values (Figure 1). The minimal increase in dissolved solids in  
211 the fermented samples over the mixture of raw materials was 2-fold and occurred at pH 5, while  
212 the highest increase was 3-fold, at pH 8.

213 To assess the reduction of protein inhibitors of key proteases due to the fermentation  
214 process, inhibitory enzyme assays were conducted. No changes in trypsin, chymotrypsin and

215 subtilisin inhibition were observed between unfermented and fermented protein blends (data not  
216 shown). A substantial reduction in papain inhibition was observed when comparing unfermented  
217 (3.4 IU/g protein blend) in comparison to the unfermented (0.6 IU/g protein protein) blend (Figure  
218 2).

219 The presence of residual phytate in plant protein can negatively affect protein digestibility. To  
220 evaluate the ability of shiitake fermentation to remove phytic acid the levels of phytate were  
221 measured in both unfermented and fermented protein blends. The percentage of phytic acids in  
222 the unfermented and fermented protein blends were 1.25% and 0.68%, respectively. These  
223 results indicate changes in physical properties and chemical composition of the fermented  
224 protein blend.

### 225 **Organoleptic characteristics of fermented pea and rice protein blend**

226 To characterize and quantify changes in volatile compounds associated with the  
227 organoleptic profile of unfermented and fermented pea and rice protein concentrate mixtures,  
228 both protein blends were subjected to GC-MS and GC-olfactometry and Combined Hedonic  
229 Aroma Response Measurement (CHARM) analyses. The results indicate a decrease in the earthy,  
230 beany, potato and mustard off-notes in the fermented protein blend compared to the unfermented,  
231 while those associated with fatty and musty are increased (Figure 3, Supp Table1-5). The  
232 analysis also indicates an overall change in the relative abundance of volatile compounds in the  
233 fermented protein blend as compared to the unfermented one (Figure 4A). Several compounds,  
234 including galbazine, methyl mercaptan, methional and a sesquiterpene similar to bergamotene  
235 (bergamotene-like) were described as imparting unpleasant off-flavors. Specifically, off-notes  
236 compounds methional, methyl mercaptan, bergamotene-like compound which are present in the  
237 unfermented protein blend were substantially reduced in the fermented protein blend by 40%,

238 78%, 99% respectively. Moreover, the potent beany off-notes associated with (galbazine) present  
239 in the unfermented protein blend were not detected in the fermented sample (Figure 4B). To  
240 further understand the aroma profile of the fermented and unfermented protein blends, a sensory  
241 evaluation was carried out by a trained sensory panel of 11 eleven people. The sensory results  
242 correlate well with data from CHARM analysis, indicating a statistically significant decrease in  
243 pea and rice notes and overall improvement aroma of the fermented blend (Table 5). The GC-MS  
244 data also reveals a relative increase in the oxylipins: 1-octen-3-one; 2,6- decadienal; 2,4-  
245 nonadienal and 2,3 butanedione in the fermented protein blend as compared to the unfermented  
246 blend (Figure 4A; Supp Table 1; Suppl Figure1), however this change was not reflected in the  
247 sensory profiles provided by the sensory panel. In fact, 2,3 butanedione had a positive impact to  
248 the sensory profiling of the fermented protein blend. All together, these results indicate an  
249 improvement in the organoleptic characteristic in the fermented pea and rice protein  
250 concentration blend versus the unfermented protein blend.

251

252

253

254

## DISCUSSION

255 A major disadvantage of plant proteins is their comparatively lower nutritional quality  
256 relative to animal derived protein. Results of the ileal digestibility study demonstrated that  
257 PDCAAS was greater for the shiitake fermented protein compared with the unfermented protein,  
258 which indicates that the fermentation process may have changed the structure of the proteins and  
259 thereby made them more digestible. The observations that for both age groups, DIAAS values  
260 for the fermented protein was 23-24% greater than for the unfermented protein further indicates

261 that fermentation increased the value of the proteins. Proteins with a DIAAS value between 75  
262 and 100 are considered “good” sources of protein whereas proteins with a DIAAS >100 are  
263 considered “excellent” proteins (Leser, 2013); in this sense, the shiitake fermentation process  
264 transformed a good protein source into an excellent one for individuals older than 3 years. The  
265 relatively lower increase in PDCAAS versus DIAAS is likely because the fermentation of  
266 proteins in the hindgut equalizes the digestibility of protein between different sources even if the  
267 ileal digestibility of amino acids is different. The reason the PDCAAS values, regardless of  
268 protein and age group, were all greater than the DIAAS values is that although the same scoring  
269 pattern was used, the digestibility of crude protein, which is used in the calculation of PDCAAS  
270 values, was greater than the digestibility of the first limiting amino acid. However, because the  
271 digestibility of amino acids is more correctly estimated by the digestibility of the individual  
272 amino acids than by the digestibility of crude protein, the DIAAS values are more representative  
273 of the nutritional value of proteins than PDCAAS values.

274         Several factors might act synergistically to increase the digestibility of the protein blend  
275 during the fermentation. Fungi are known to secrete a wide variety of enzymes, including  
276 proteases. Shiitake secreted proteases might “pre-digest” the protein substrate before they reach  
277 the pig digestive system while the increased solubility of the fermented protein, especially at low  
278 pH, may partially account for the observed increased digestibility. Additionally, the level of the  
279 gastric enzymes’ inhibitor, phytate, was substantially reduced by the fungal fermentation  
280 process. It is very foreseeable that this lower phytate level also contributed to the observed  
281 increase in the pigs’ digestibility of the fermented protein blend. Genome searches of different  
282 publicly available shiitake genomes indicates that different strains contain at least 5 genes  
283 encoding predicted phytases in addition to additional genes encoding potential inositol

284 polyphosphate phosphatases (<https://mycocosm.jgi.doe.gov/mycocosm/home>). Moreover, the  
285 presence of a signal peptide sequence at the N-terminus of most phytases, suggests that shiitake  
286 secretes a substantial amount of phytase that could act to degrade phytic acid during fermentation  
287 of pea and rice substrates, accounting for the approximately 46% reduction of phytate in the  
288 fermented blend. A substantial reduction in cysteine protease inhibition (papain) is observed  
289 during the fermentation process. Enzymatic microbial enzymatic activity during fermentation has  
290 also been shown to reduce gastric protein inhibitors from plant protein (Avilés-Gaxiola et al.,  
291 2018). On the other hand, the antinutrient papain inhibitor oryzacystatin-I is a protein itself,  
292 therefore the denaturation/degradation of this protein during sterilization process of the  
293 unfermented pea and rice protein blend could also partially contribute to the reduced enzyme  
294 inhibition in the fermented protein blend.

295

296 White-rot fungi, such as shiitake, secrete a cocktail of “lignin modifying enzymes” (LME)  
297 which catalyze the breakdown of lignin, an amorphous polymer present in the cell wall of plants  
298 and the main constituent of wood. LME are oxidizing enzymes and include manganese  
299 peroxidase (EC 1.11.1.13), lignin peroxidase (EC 1.11.1.14), versatile peroxidase (EC 1.11.1.16)  
300 and laccases (EC 1.10.3.2). Many LME have a low specificity and can oxidize a wide range of  
301 substrates with phenolic residues, beside lignin (Plácido & Capareda, 2015). For example,  
302 laccases oxidize a variety of phenolic substrates, performing one-electron oxidations, leading to  
303 crosslinking and polymerization (Eisenman et al., 2007) of the ring cleavage of aromatic  
304 compounds. Fungal laccases and tyrosinases oxidize phenolic residues in protein and  
305 carbohydrates present in wheat flour improving its baking properties (Selinheimo & Valtion  
306 teknillinen tutkimuskeskus, 2008). Moreover, shiitake laccases have been used to remove off-

307 flavor notes from apple juice (Schroeder et al., 2008). Gene expression profiling (RNA-Seq)  
308 indicates that many laccase genes as well as other LMEs are expressed by shiitake, and a few are  
309 upregulated during the shiitake fermentation of pea and rice protein blend (data not shown).  
310 Therefore, it is very likely that shiitake LME oxidation of key phenolic residues in the protein  
311 blend accounts in part for the reduction/elimination of off-note compounds, resulting in  
312 improved organoleptic properties. Other mechanisms such as physical trapping of volatiles and  
313 thermal reactions during the sterilization and drying of the protein blends may also contribute to  
314 the changes in olfactory character. Further studies on the mode of action and combination of  
315 mechanisms responsible for the taste improving capacity of shiitake mycelium fermentation are  
316 ongoing.

317

## 318 **Conclusion**

319 The benefits of fermentation on pea protein taste and aroma has been demonstrated by  
320 Schindler and colleagues<sup>54</sup>. However, to our knowledge, the work presented here is the first  
321 successful application of fungal fermentation for the improvement of plant-based protein  
322 concentration. The action of the fungal mycelium results in a reduction of compounds negatively  
323 impacting the organoleptic characteristics of plant proteins while improving the digestibility and  
324 reducing antinutrient contents. This pioneering work will most certainly serve as a basis for  
325 future application of mycelial fermentation to improve the quality of low-quality sources to meet  
326 the food standards associated with food ingredients.

327  
328  
329  
330  
331  
332  
333  
334  
335  
336  
337  
338  
339  
340  
341  
342  
343  
344  
345  
346  
347  
348  
349

## REFERENCES

Abe, K., Kondo, H., & Arai, S. (1987). Purification and Characterization of a Rice Cysteine Proteinase Inhibitor. *Agricultural and Biological Chemistry*, *51*(10), 2763–2768.  
<https://doi.org/10.1080/00021369.1987.10868462>

Acree, T. E., & van Ruth, S. (2003). Gas Chromatography/Olfactometry. *Current Protocols in Food Analytical Chemistry*, *10*(1), G1.8.1-G1.8.12. <https://doi.org/10.1002/0471142913.fag0108s10>

Afify, A. E.-M. M. R., El-Beltagi, H. S., Abd El-Salam, S. M., & Omran, A. A. (2012). Protein Solubility, Digestibility and Fractionation after Germination of Sorghum Varieties. *PLoS ONE*, *7*(2), e31154.  
<https://doi.org/10.1371/journal.pone.0031154>

Avilés-Gaxiola, S., Chuck-Hernández, C., & Serna Saldívar, S. O. (2018). Inactivation Methods of Trypsin Inhibitor in Legumes: A Review: Inactivation of trypsin inhibitor.... *Journal of Food Science*, *83*(1), 17–29. <https://doi.org/10.1111/1750-3841.13985>

Bailey, H. M., & Stein, H. H. (2019). Can the digestible indispensable amino acid score methodology decrease protein malnutrition. *Animal Frontiers*, *9*(4), 18–23. <https://doi.org/10.1093/af/vfz038>

Bohn, L., Meyer, A. S., & Rasmussen, Søren. K. (2008). Phytate: Impact on environment and human nutrition. A challenge for molecular breeding. *Journal of Zhejiang University SCIENCE B*, *9*(3), 165–191. <https://doi.org/10.1631/jzus.B0710640>

Cervantes-Pahm, S. K., Liu, Y., & Stein, H. H. (2014). Digestible indispensable amino acid score and digestible amino acids in eight cereal grains. *The British Journal of Nutrition; Cambridge*, *111*(9), 1663–1672. <http://dx.doi.org.aurarialibrary.idm.oclc.org/10.1017/S0007114513004273>



- 350 Cupp-Enyard, C. (2008). Sigma's Non-specific Protease Activity Assay—Casein as a Substrate. *Journal of*  
351 *Visualized Experiments*, 19, 899. <https://doi.org/10.3791/899>
- 352 Deshpande, S. S., & Cheryan, M. (1984). Effects of Phytic Acid, Divalent Cations, and Their Interactions  
353 on Amylase Activity. *Journal of Food Science*, 49(2), 516–519. <https://doi.org/10.1111/j.1365->  
354 2621.1984.tb12456.x
- 355 Eisenman, H. C., Mues, M., Weber, S. E., Frases, S., Chaskes, S., Gerfen, G., & Casadevall, A. (2007).  
356 *Cryptococcus neoformans* laccase catalyses melanin synthesis from both d- and l-DOPA.  
357 *Microbiology*, 153(12), 3954–3962. <https://doi.org/10.1099/mic.0.2007/011049-0>
- 358 FAO. (2013). Dietary protein quality evaluation in human nutrition. Report of an FAQ Expert  
359 Consultation. *FAO Food and Nutrition Paper*, 92, 1–66.
- 360 FAO. (2014). *Research approaches and methods for evaluating the protein quality of human foods:*  
361 *Report of a FAO Expert Working Group.*
- 362 FAO/WHO. (1991). Protein quality evaluation: Report of the Joint FAO/WHO Expert Consultation. Rome  
363 (Italy): FAO. *FAO Food and Nutrition Paper 51.*
- 364 Gläser, P., Dawid, C., Meister, S., Bader-Mittermaier, S., Schott, M., Eisner, P., & Hofmann, T. (2020).  
365 Molecularization of Bitter Off-Taste Compounds in Pea-Protein Isolates (*Pisum sativum*). *Journal*  
366 *of Agricultural and Food Chemistry*, acs.jafc.9b06663. <https://doi.org/10.1021/acs.jafc.9b06663>
- 367 Gorissen, S. H. M., Crombag, J. J. R., Senden, J. M. G., Waterval, W. A. H., Bierau, J., Verdijk, L. B., & van  
368 Loon, L. J. C. (2018). Protein content and amino acid composition of commercially available  
369 plant-based protein isolates. *Amino Acids*, 50(12), 1685–1695. <https://doi.org/10.1007/s00726->  
370 018-2640-5
- 371 Gupta, R. K., Gangoliya, S. S., & Singh, N. K. (2015). Reduction of phytic acid and enhancement of  
372 bioavailable micronutrients in food grains. *Journal of Food Science and Technology*, 52(2), 676–  
373 684. <https://doi.org/10.1007/s13197-013-0978-y>

- 374 Hootman, R., Muñoz, A., & Civille, G. (1992). The Spectrum Descriptive Analysis Method. In R. Hootman  
375 (Ed.), *Manual on Descriptive Analysis Testing for Sensory Evaluation* (pp. 22-22–13). ASTM  
376 International. <https://doi.org/10.1520/MNL10524M>
- 377 Horowitz, S. T., Roseman, S., & Blumenthal, H. J. (1957). The Preparation of Glucosamine  
378 Oligosaccharides. I. Separation<sup>1,2</sup>. *Journal of the American Chemical Society*, *79*(18), 5046–5049.  
379 <https://doi.org/10.1021/ja01575a059>
- 380 Irvine, G. B., Ennis, M., & Williams, C. H. (1990). Visual detection of peptidase activity using fluorogenic  
381 substrates in a microtiter plate assay. *Analytical Biochemistry*, *185*(2), 304–307.  
382 [https://doi.org/10.1016/0003-2697\(90\)90298-N](https://doi.org/10.1016/0003-2697(90)90298-N)
- 383 Jatuwong, K., Suwannarach, N., Kumla, J., Penkhrue, W., Kakumyan, P., & Lumyong, S. (2020). Bioprocess  
384 for Production, Characteristics, and Biotechnological Applications of Fungal Phytases. *Frontiers*  
385 *in Microbiology*, *11*, 188. <https://doi.org/10.3389/fmicb.2020.00188>
- 386 Joye, I. (2019). Protein Digestibility of Cereal Products. *Foods*, *8*(6), 199.  
387 <https://doi.org/10.3390/foods8060199>
- 388 Khan, A., & Ghosh, K. (2013). Phytic Acid-Induced Inhibition of Digestive Protease and  $\alpha$ -Amylase in  
389 Three Indian Major Carps: An in vitro Study: INHIBITION OF CARP DIGESTIVE ENZYMES BY  
390 PHYTIC ACID. *Journal of the World Aquaculture Society*, *44*(6), 853–859.  
391 <https://doi.org/10.1111/jwas.12084>
- 392 Lajolo, F. M., & Genovese, M. I. (2002). Nutritional Significance of Lectins and Enzyme Inhibitors from  
393 Legumes. *Journal of Agricultural and Food Chemistry*, *50*(22), 6592–6598.  
394 <https://doi.org/10.1021/jf020191k>
- 395 Lei, X. G., Weaver, J. D., Mullaney, E., Ullah, A. H., & Azain, M. J. (2013). Phytase, a New Life for an “Old”  
396 Enzyme. *Annual Review of Animal Biosciences*, *1*(1), 283–309. [https://doi.org/10.1146/annurev-](https://doi.org/10.1146/annurev-animal-031412-103717)  
397 [animal-031412-103717](https://doi.org/10.1146/annurev-animal-031412-103717)

- 398 Leser, S. (2013). The 2013 FAO report on dietary protein quality evaluation in human nutrition:  
399 Recommendations and implications. *Nutrition Bulletin*, 38(4), 421–428.  
400 <https://doi.org/10.1111/nbu.12063>
- 401 Mathai, J. K., Liu, Y., & Stein, H. H. (2017). Values for digestible indispensable amino acid scores (DIAAS)  
402 for some dairy and plant proteins may better describe protein quality than values calculated  
403 using the concept for protein digestibility-corrected amino acid scores (PDCAAS). *The British*  
404 *Journal of Nutrition; Cambridge*, 117(4), 490–499.  
405 <http://dx.doi.org/aurarialibrary.idm.oclc.org/10.1017/S0007114517000125>
- 406 Plácido, J., & Capareda, S. (2015). Ligninolytic enzymes: A biotechnological alternative for bioethanol  
407 production. *Bioresources and Bioprocessing*, 2(1), 23. [https://doi.org/10.1186/s40643-015-0049-](https://doi.org/10.1186/s40643-015-0049-5)  
408 5
- 409 Reddy, N. R., Sathe, S. K., & Salunkhe, D. K. (1982). Phytates in Legumes and Cereals. In *Advances in Food*  
410 *Research* (Vol. 28, pp. 1–92). Elsevier. [https://doi.org/10.1016/S0065-2628\(08\)60110-X](https://doi.org/10.1016/S0065-2628(08)60110-X)
- 411 Roland, W. S. U., Pouvreau, L., Curran, J., Velde, F. van de, & Kok, P. M. T. de. (2017). Flavor Aspects of  
412 Pulse Ingredients. *Cereal Chemistry*, 94(1), 58–65. [https://doi.org/10.1094/CCHEM-06-16-0161-](https://doi.org/10.1094/CCHEM-06-16-0161-FI)  
413 FI
- 414 Samtiya, M., Aluko, R. E., & Dhewa, T. (2020). Plant food anti-nutritional factors and their reduction  
415 strategies: An overview. *Food Production, Processing and Nutrition*, 2(1), 6.  
416 <https://doi.org/10.1186/s43014-020-0020-5>
- 417 Sauer, W. C., & Ozimek, L. (1986). Digestibility of amino acids in swine: Results and their practical  
418 applications. A review. *Livestock Production Science*, 15(4), 367–388.  
419 [https://doi.org/10.1016/0301-6226\(86\)90076-X](https://doi.org/10.1016/0301-6226(86)90076-X)

- 420 Schindler, S., Zelena, K., Krings, U., Bez, J., Eisner, P., & Berger, R. G. (2012). Improvement of the Aroma  
421 of Pea (*Pisum sativum*) Protein Extracts by Lactic Acid Fermentation. *Food Biotechnology*, *26*(1),  
422 58–74. <https://doi.org/10.1080/08905436.2011.645939>
- 423 Schroeder, M., Pöllinger-Zierler, B., Aichernig, N., Siegmund, B., & Guebitz, G. M. (2008). Enzymatic  
424 removal of off-flavors from apple juice. *Journal of Agricultural and Food Chemistry*, *56*(7), 2485–  
425 2489. <https://doi.org/10.1021/jf073303m>
- 426 Selinheimo, E., & Valtion teknillinen tutkimuskeskus. (2008). *Tyrosinase and laccase as novel crosslinking*  
427 *tools for food biopolymers*. VTT.
- 428 Sexton, A. E., Garnett, T., & Lorimer, J. (2019). Framing the future of food: The contested promises of  
429 alternative proteins. *Environment and Planning E: Nature and Space*, *2*(1), 47–72.  
430 <https://doi.org/10.1177/2514848619827009>
- 431 Sharma, C. B., Goel, M., & Irshad, M. (1978). Myoinositol hexaphosphate as a potential inhibitor of  $\alpha$ -  
432 amylases. *Phytochemistry*, *17*(2), 201–204. [https://doi.org/10.1016/S0031-9422\(00\)94146-3](https://doi.org/10.1016/S0031-9422(00)94146-3)
- 433 Soni Bhupendra, Kelly Brooks, Langan Jim, Hanh Alan. (2018). *Methods for the production and use of*  
434 *myceliated high protein food compositions* (Patent No. US 10,0101,103).
- 435 Sotak-Peper, K. M., González-Vega, J. C., & Stein, H. H. (2017). Amino acid digestibility in soybean meal  
436 sourced from different regions of the United States and fed to pigs. *Journal of Animal Science*,  
437 *95*(2), 771. <https://doi.org/10.2527/jas2016.0443>
- 438 Stein, H. H., Sève, B., Fuller, M. F., Moughan, P. J., & Lange, C. F. M. de. (2007). Invited review: Amino  
439 acid bioavailability and digestibility in pig feed ingredients: Terminology and application. *Journal*  
440 *of Animal Science; Champaign*, *85*(1), 172–180.
- 441 USDA. (2013). *Composition of Foods Raw, Processed, Prepared USDA National Nutrient Database for*  
442 *Standard Reference, Release 26*.

443 Wolfe, R. R., Rutherford, S. M., Kim, I.-Y., & Moughan, P. J. (2016). Protein quality as determined by the  
444 Digestible Indispensable Amino Acid Score: Evaluation of factors underlying the calculation:  
445 Table 1. *Nutrition Reviews*, 74(9), 584–599. <https://doi.org/10.1093/nutrit/nuw022>  
446

#### 447 **Figure legends**

448

449 **Figure 1. Changes in solubility during with fermentation process.** The solubility of  
450 unfermented (**UF**) and fermented (**F**) protein blend was evaluated at pH 3, 4, 5, 6, 7 and 8.  
451 Values represent the mean of 3 technical replicates. Error bars express standard error. Asterisks  
452 indicate significant difference (t-test;  $P < 0.01$ ).

453 **Figure 2. Quantification of papain activity.** Papain enzyme inhibition was evaluated in the  
454 presence of unfermented (UF) and fermented (F) protein blends. Asterisks indicate significant  
455 difference (t-test;  $P < 0.01$ ).

456 **Figure 3. Odorant profile analysis of fermented and unfermented protein blends.** GC-  
457 olfactometry and Combined Hedonic Aroma Response Measurement (CHARM) analyses of  
458 fermented and unfermented protein blends. Only attributes that are significantly different at the  
459 90% confidence level as tested by ANOVA are shown in the spider plot.

460

461 **Figure 4. Quantification of odorants in fermented and unfermented protein blends. A)**  
462 Levels of known volatiles compounds detected during CHARM analysis in fermented (black bars)  
463 and unfermented (gray bars) protein blends were expressed. **B)** Relative reduction of off-notes

464 associated volatiles in fermented. Values were calculated as percentage of levels in unfermented  
465 and fermented protein blends.

466 **Supplementary Figure 1. Fold-change of detected oxylipins.** Levels of detected oxylipin  
467 derived compounds present in the fermented protein blend were normalized to value detected in  
468 the unfermented protein blend.

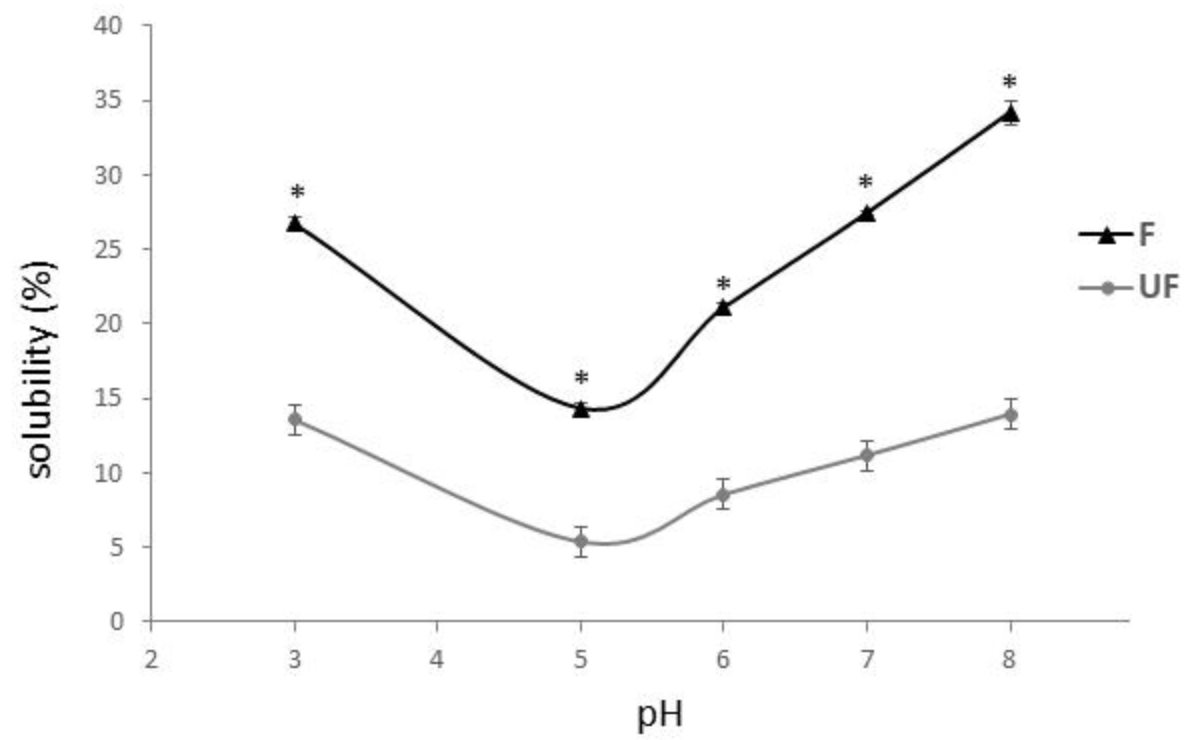

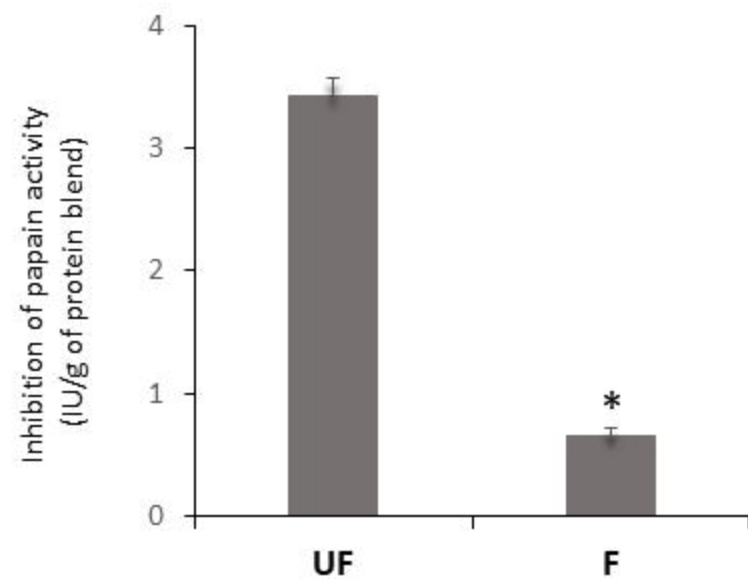



- unfermented
- fermented

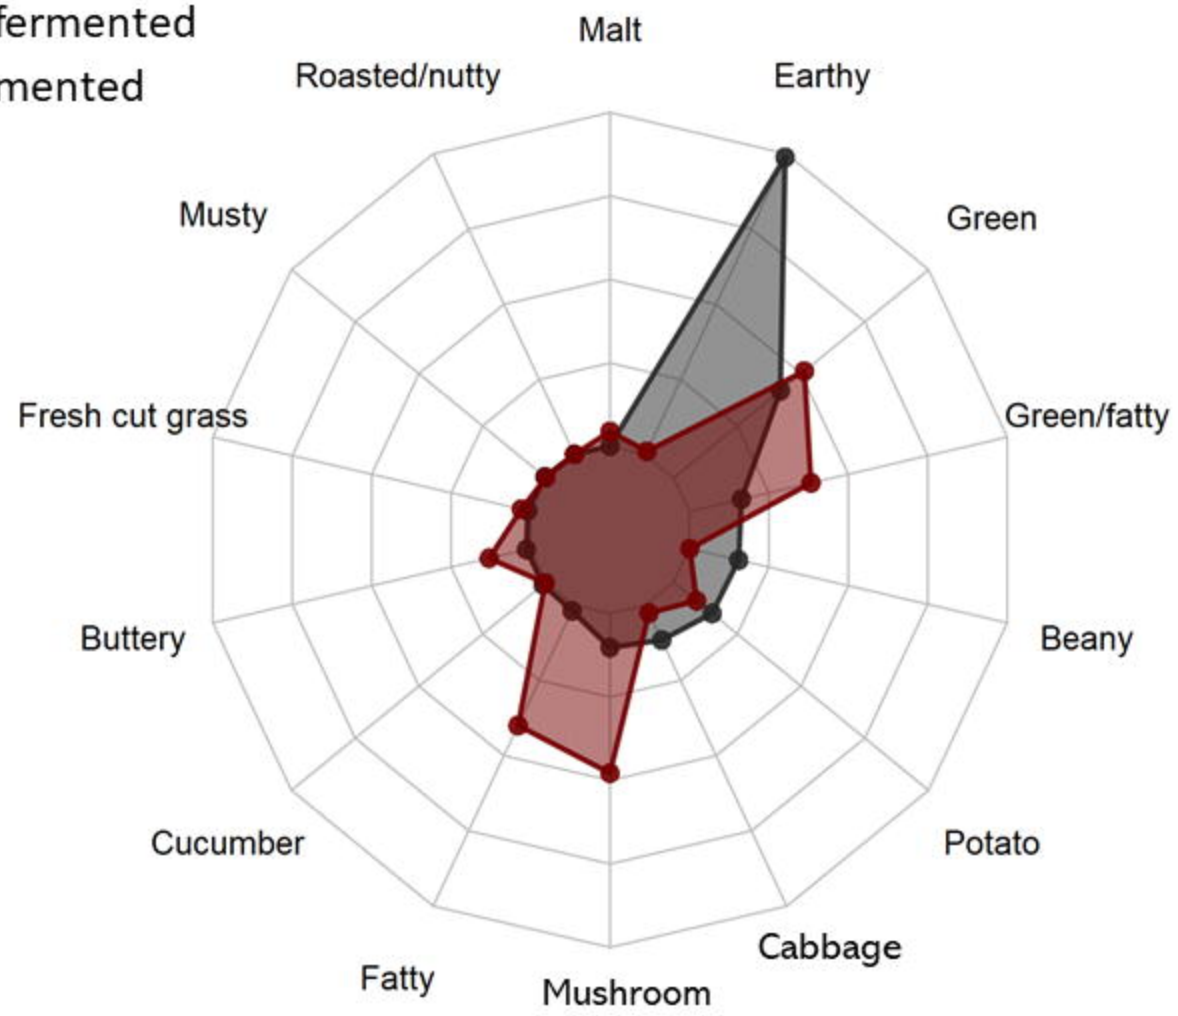

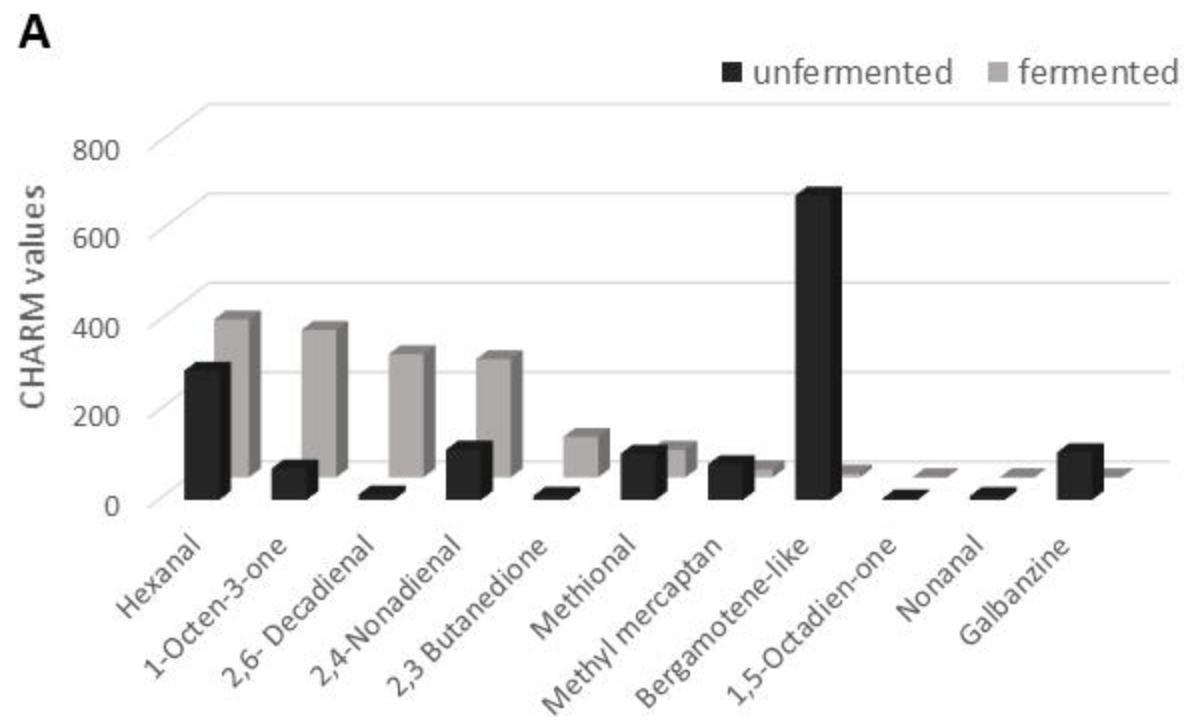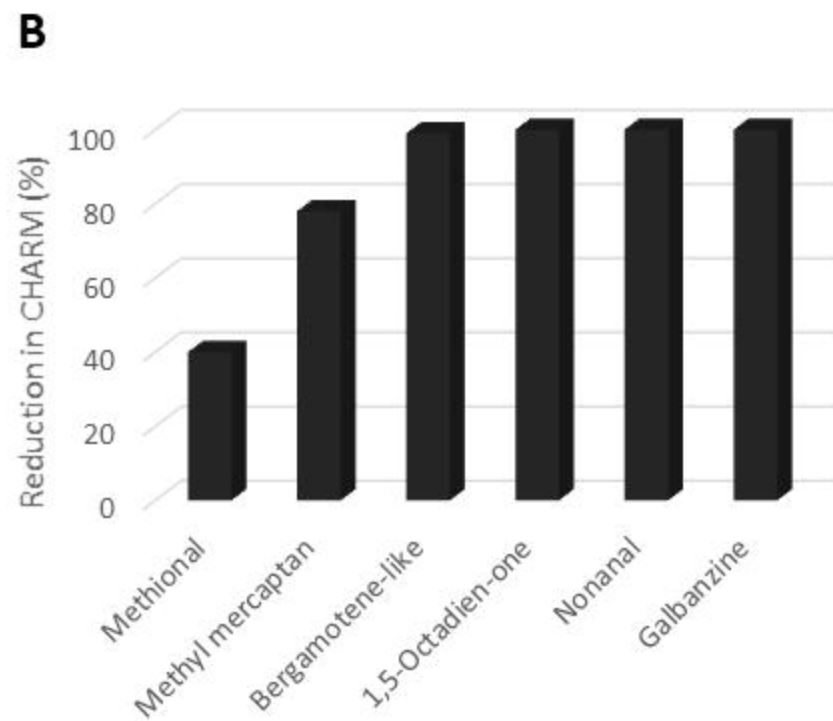

Source: https://www.biorxiv.org/content/10.1101/2021.10.07.463529v1.full.pdf
